# Supplementary material for: The Curcumin Analog C-150, Influencing NF-κB, UPR and Akt/Notch Pathways Has Potent Anticancer Activity In Vitro and In Vivo
Source: PubMed Central journal article supplement (PMC4778904; doi:10.1371/journal.pone.0149832), 2016-03-04
Supplement: pone.0149832.s001.pdf [file pone.0149832.s001.pdf]

# Supplementary Table 1.

|                                     | <b>ATF4</b> |      | <b>GRP78</b> |      | <b>XBP1</b> |      | <b>GADD153</b> |      |
|-------------------------------------|-------------|------|--------------|------|-------------|------|----------------|------|
|                                     | Fold change | SD   | Fold change  | SD   | Fold change | SD   | Fold change    | SD   |
| <b>Control</b>                      | 1.00        | 0.10 | 1.01         | 0.17 | 1.00        | 0.12 | 1.00           | 0.07 |
| <b>C, 10 <math>\mu</math>M</b>      | 1.10        | 0.16 | 1.42         | 0.21 | 1.69        | 0.56 | 1.36           | 0.05 |
| <b>C-150, 0.5 <math>\mu</math>M</b> | 2.03        | 0.30 | 3.12         | 0.44 | 3.88        | 0.19 | 14.24          | 2.95 |
| <b>C-150, 1 <math>\mu</math>M</b>   | 2.18        | 0.28 | 4.83         | 0.13 | 3.74        | 0.51 | 10.24          | 2.16 |

| p values (n=3)                                 | <b>ATF4</b> | <b>GRP78</b> | <b>XBP1</b> | <b>GADD153</b> |
|------------------------------------------------|-------------|--------------|-------------|----------------|
| <b>C 10 <math>\mu</math>M vs Control</b>       | 0.43275     | 0.06132      | 0.10528     | 0.00290        |
| <b>C-150, 0.5 <math>\mu</math>M vs Control</b> | 0.00256     | 0.00093      | 0.00005     | 0.00003        |
| <b>C-150, 1 <math>\mu</math>M vs Control</b>   | 0.00125     | 0.00010      | 0.00024     | 0.00005        |
